# Supplementary material for: Quantitative Assessment of Tip Effects in Single‐Molecule High‐Speed Atomic Force Microscopy Using DNA Origami Substrates
Source: PubMed Central journal article supplement (PMC7496922; doi:10.1002/anie.202005884), 2020-07-07
Supplement: ANIE-59-14336-s001.pdf [file ANIE-59-14336-s001.pdf]

## Supporting Information

### **Quantitative Assessment of Tip Effects in Single-Molecule High-Speed Atomic Force Microscopy Using DNA Origami Substrates**

*Charlotte Kielar, Siqi Zhu, Guido Grundmeier, and Adrian Keller\**

anie\_202005884\_sm\_miscellaneous\_information.pdf

anie\_202005884\_sm\_Movie1.avi

anie\_202005884\_sm\_Movie10.avi

anie\_202005884\_sm\_Movie11.avi

anie\_202005884\_sm\_Movie12.avi

anie\_202005884\_sm\_Movie13.avi

anie\_202005884\_sm\_Movie14.avi

anie\_202005884\_sm\_Movie15.avi

anie\_202005884\_sm\_Movie16.avi

anie\_202005884\_sm\_Movie17.avi

anie\_202005884\_sm\_Movie18.avi

anie\_202005884\_sm\_Movie19.avi

anie\_202005884\_sm\_Movie2.avi

anie\_202005884\_sm\_Movie20.avi

anie\_202005884\_sm\_Movie3.avi

anie\_202005884\_sm\_Movie4.avi

anie\_202005884\_sm\_Movie5.avi

anie\_202005884\_sm\_Movie6.avi

anie\_202005884\_sm\_Movie7.avi

anie\_202005884\_sm\_Movie8.avi

anie\_202005884\_sm\_Movie9.avi

## SUPPORTING INFORMATION

## Experimental Procedures

## DNA origami assembly

Rothemund triangles<sup>[1]</sup> have been assembled from 208 staple strands (Metabion) and the M13mp18 scaffold as previously described<sup>[2]</sup> in 1 x TAE (Roth) containing 10 mM MgCl<sub>2</sub> (Sigma-Aldrich). The Bt-modified staple strands (Metabion, see Table S1) were added in 10-fold excess to the unmodified staple strands. Hybridization was carried out in a Thermocycler Primus 25 advanced (PEQLAB) by heating to 80°C and subsequent cooling to room temperature over a time course of 90 min. The samples were purified with 1 x TAE/MgCl<sub>2</sub> buffer by spin filtering using 100 kDa Ultra-0.5 ml centrifugal filters (Amicon). The concentration of the purified DNA origami solution was determined with an IMPLEN nanophotometer and adjusted with 1 x TAE/MgCl<sub>2</sub> to 5 nM.

**Table S1.** Sequences of all Bt-modified staple strands. The T<sub>4</sub> spacers indicated in bold face. Rothemund's original notation is used to identify the staples.

| Modified staples | Oligonucleotide sequences 5' → 3'                   |
|------------------|-----------------------------------------------------|
| t-1s6e           | Bt- <b>TTTTT</b> TAGTATCGCCAACGCTCAACAGTCGGCTGTC    |
| t-1s16e          | Bt- <b>TTTT</b> ATTCGGTCTGCGGGATCGTCACCCGAAATCCG    |
| t-1s26e          | Bt- <b>TTTT</b> GCCAGTGCATCCCCGGGTACCGAGTTTTTCT     |
| t6s5g            | Bt- <b>TTTT</b> CAGAGCCAGGAGGTTGAGGCAGGTAACAGTGCCCG |
| t6s15g           | Bt- <b>TTTT</b> ATAAAGCCTTTGCGGGAGAAGCCTGGAGAGGGTAG |
| t6s25g           | Bt- <b>TTTT</b> CAATAGATATTAATCCTTTGCCGGTTAGAACCCT  |
| t6s7f            | ATTAAAGGCCGTAATCAGTAGCGAGCCACCCT <b>TTTT</b> -Bt    |
| t6s17f           | TAAGAGGTCAATTCTGCGAACGAGATTAAGCA <b>TTTT</b> -Bt    |
| t6s27f           | CAATATTTGCCTGCAACAGTGCCATAGAGCC <b>TTTT</b> -Bt     |

## Sample preparation for HS-AFM measurement

20 µl DNA origami solution with a concentration of 5 nM was pipetted onto a freshly cleaved mica substrate (1 cm diameter) mounted in a liquid cell and incubated for 2 minutes. Then, the substrate was washed with 1 ml of 1 x TAE/MgCl<sub>2</sub> buffer (pH 7.5) to remove unbound DNA origami. The liquid cell was then filled with 1 ml of 1 x TAE/MgCl<sub>2</sub> buffer (pH 7.5) containing 20 nM SAV (Sigma-Aldrich). After 1 h of incubation, the sample was subjected to HS-AFM imaging.

## HS-AFM imaging

HS-AFM imaging was performed using a JPK Nanowizard ULTRA Speed using USC-F0.3-k0.3 cantilevers ( $f = 300$  kHz,  $k = 0.3$  N/m, NanoWorld). The images were recorded with scan sizes of  $1 \times 1 \mu\text{m}^2$  and a resolution of  $512 \times 512$  px<sup>2</sup>. A constant free amplitude of 3.3 nm was used throughout the experiments.

## Determination of binding yields from the recorded HS-AFM images

Time-dependent binding yields were determined by manually counting the occupation all the binding sites of five selected DNA origami in each recorded frame, averaging over a total of 15 monodentate and 15 bidentate SAV-Bt binding sites. The steady-state binding yields presented in Figure 5 have been determined by performing a linear fit with slope zero in the final 100 s (from 500 s to 600 s) of the saturation regime.

## SUPPORTING INFORMATION

## Additional Data

Selected AFM images of the different time series

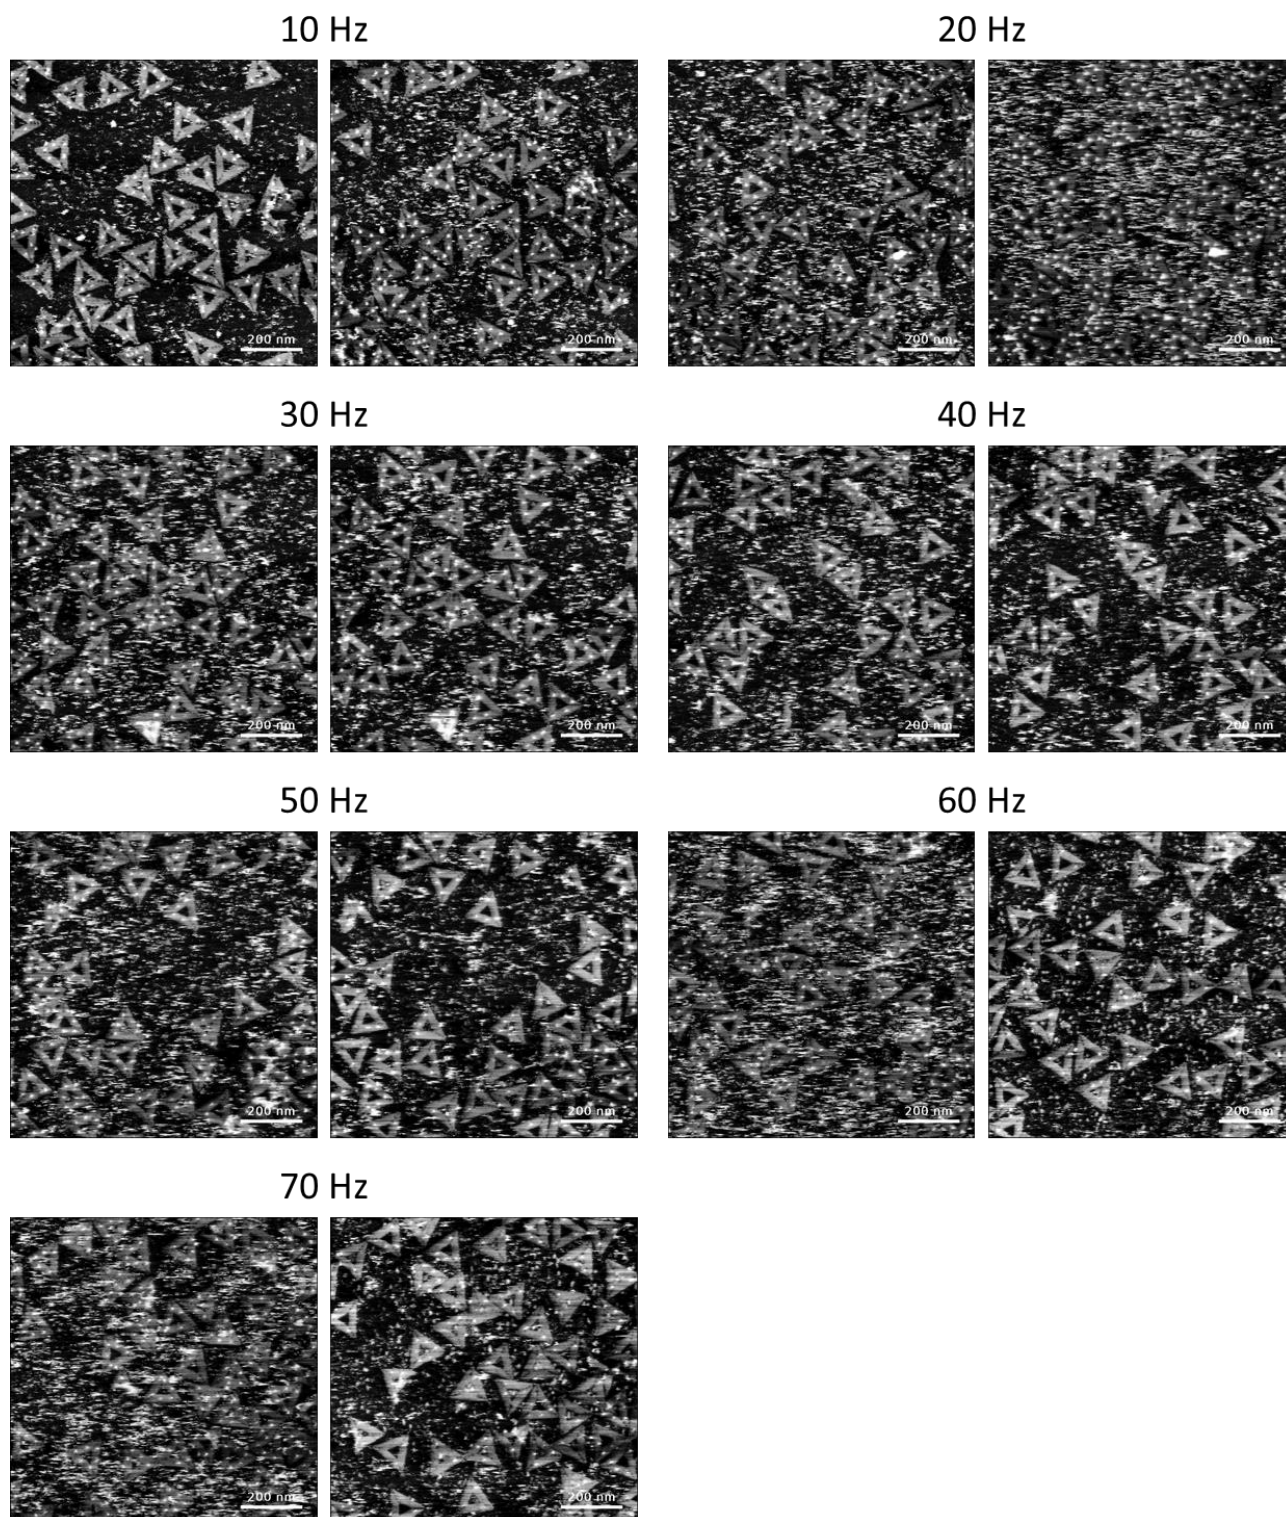

Figure S1. First (left) and last (right) AFM images recorded at the beginning and the end of the time series, respectively, for  $SR = 0.7$  and different LRs.

## SUPPORTING INFORMATION

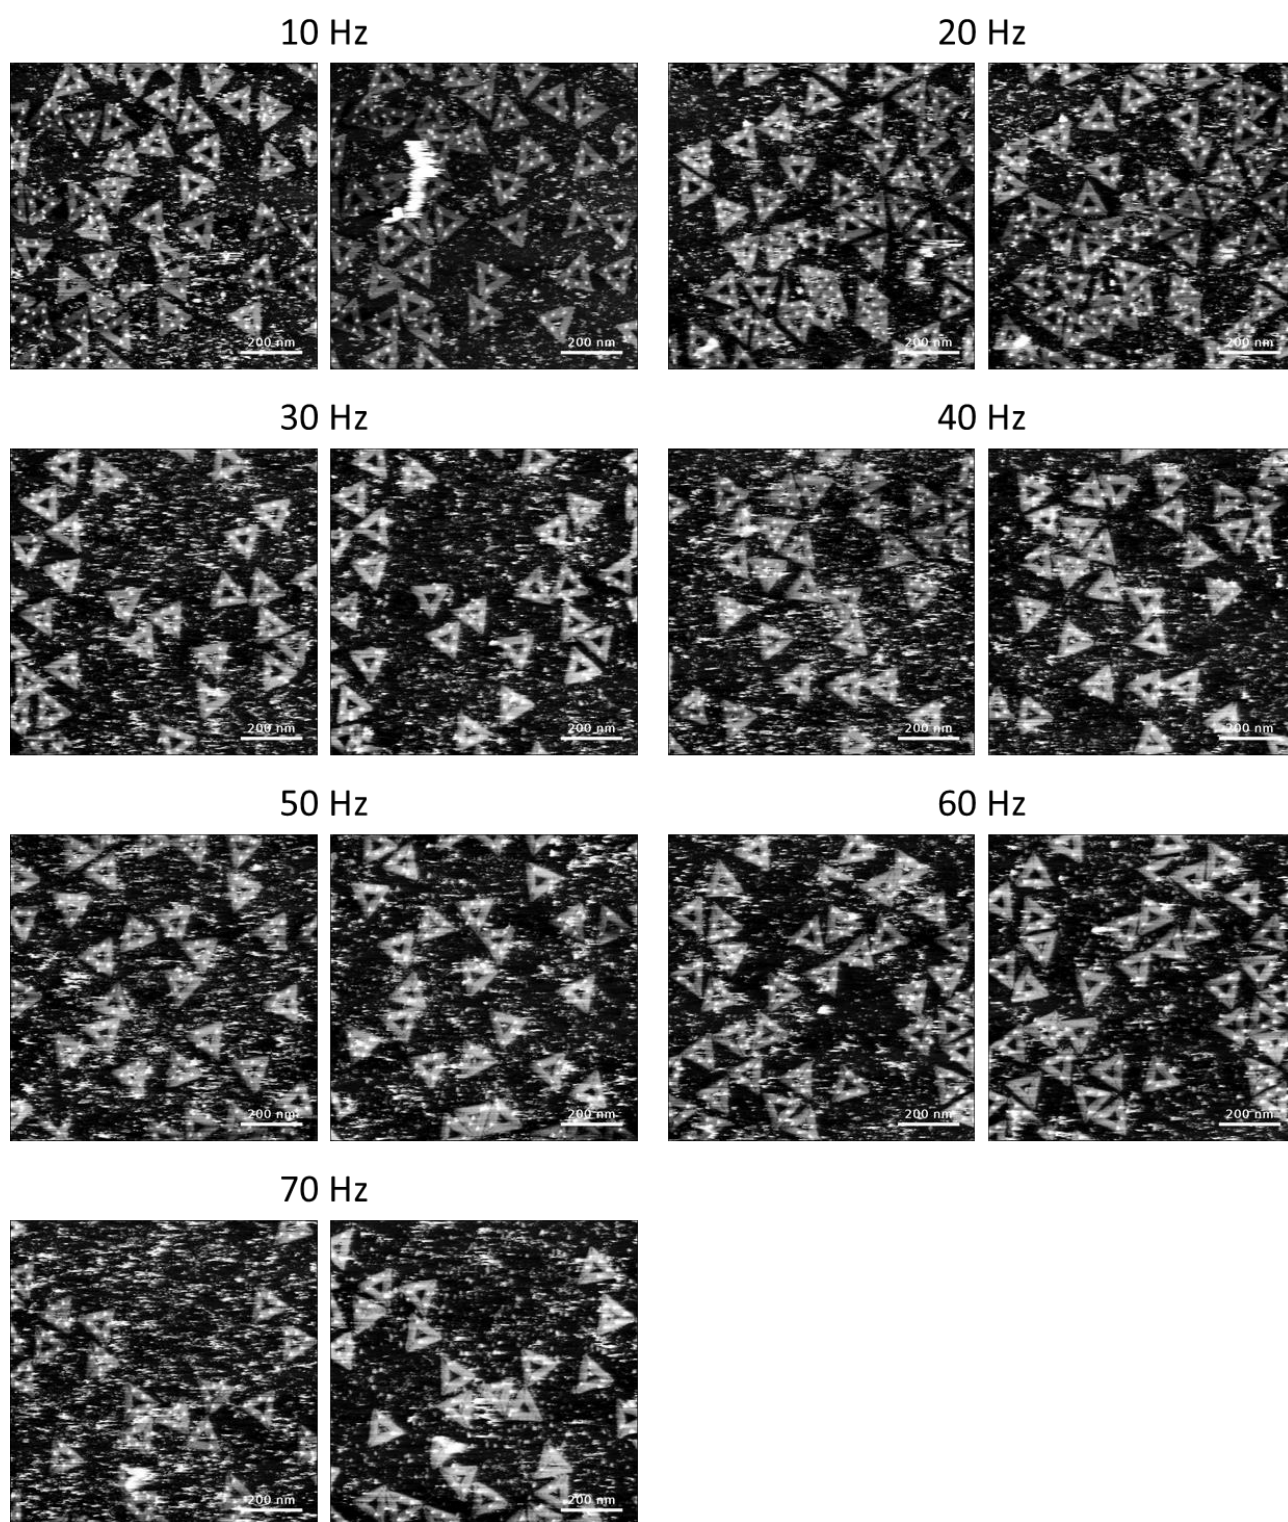

**Figure S2.** First (left) and last (right) AFM images recorded at the beginning and the end of the time series, respectively, for  $SR = 0.8$  and different LRs.

## SUPPORTING INFORMATION

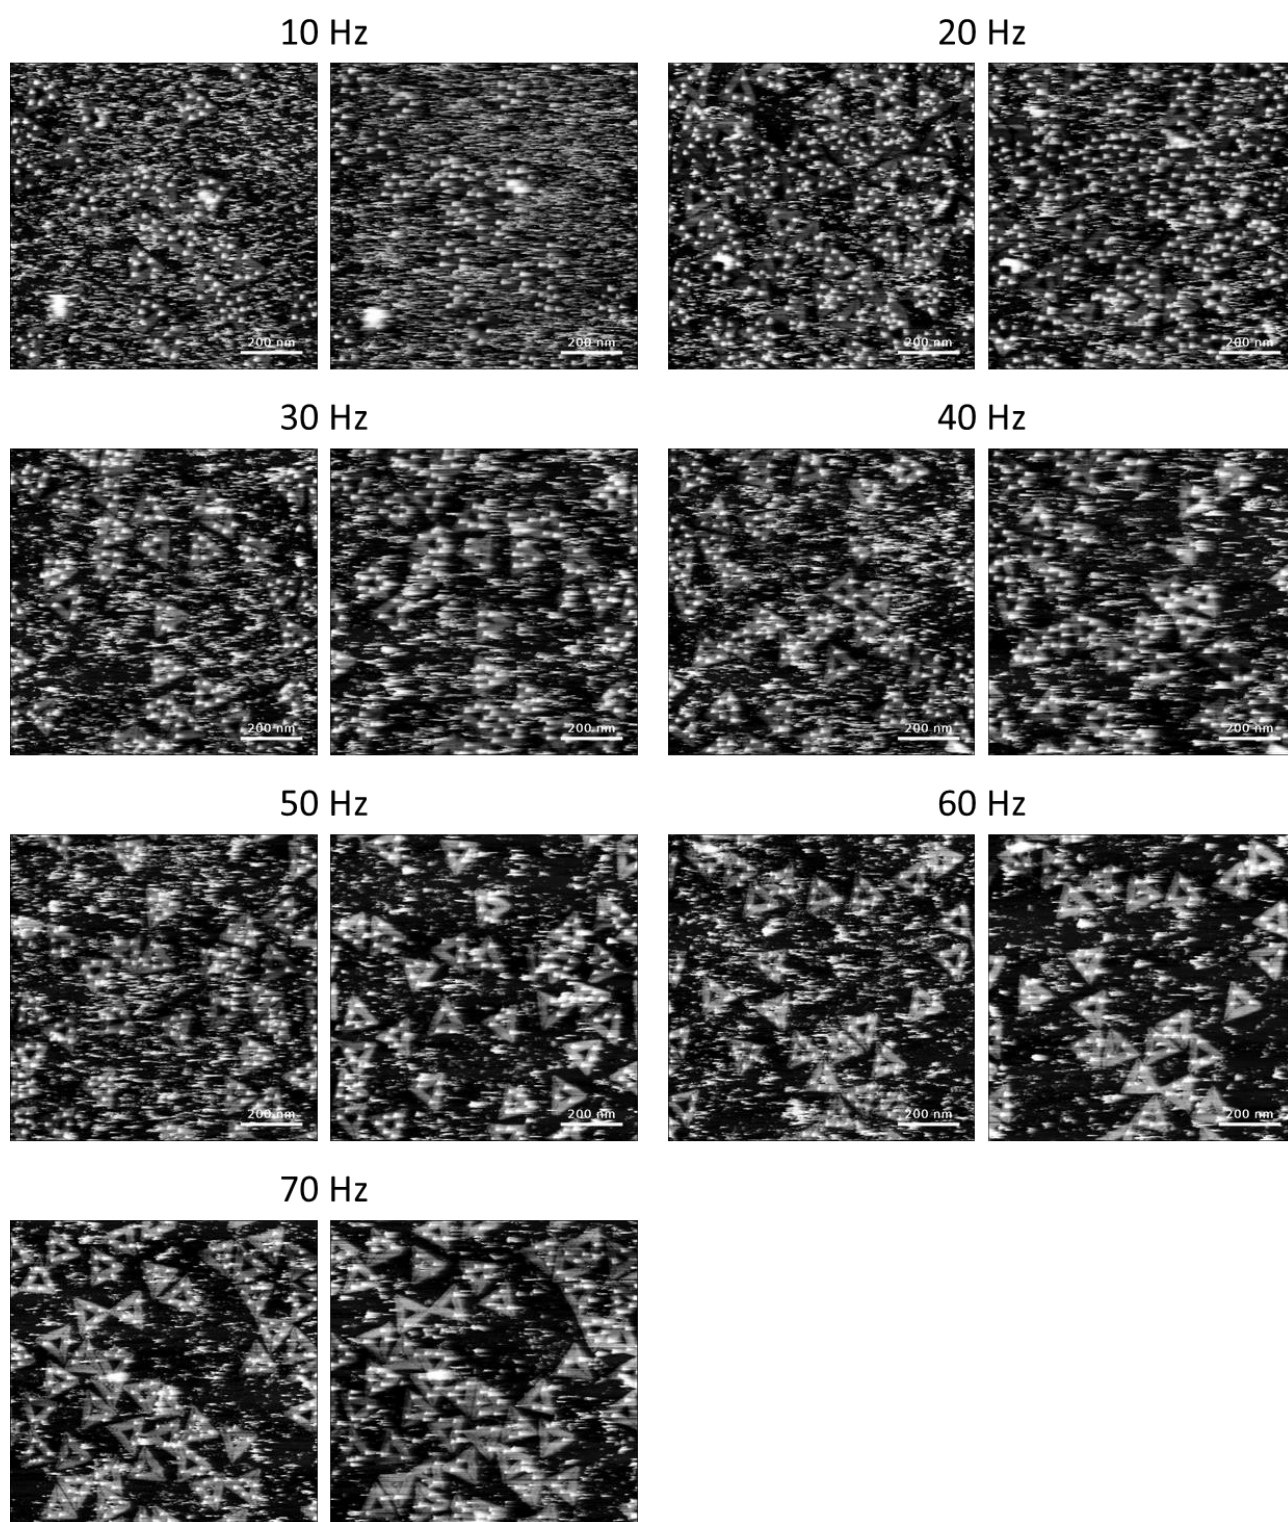

**Figure S3.** First (left) and last (right) AFM images recorded at the beginning and the end of the time series, respectively, for  $SR = 0.9$  and different LRs.

## SUPPORTING INFORMATION

## Binding yields obtained at different LRs and SRs

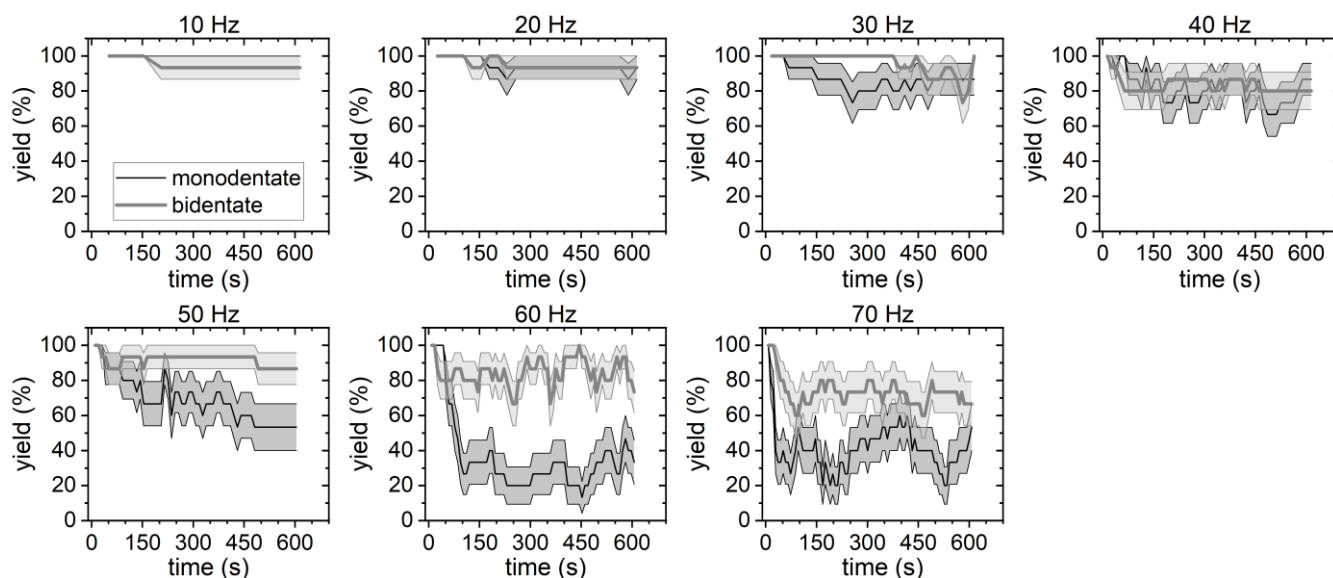

Figure S4. Binding yields obtained at different LRs and SR = 0.8.

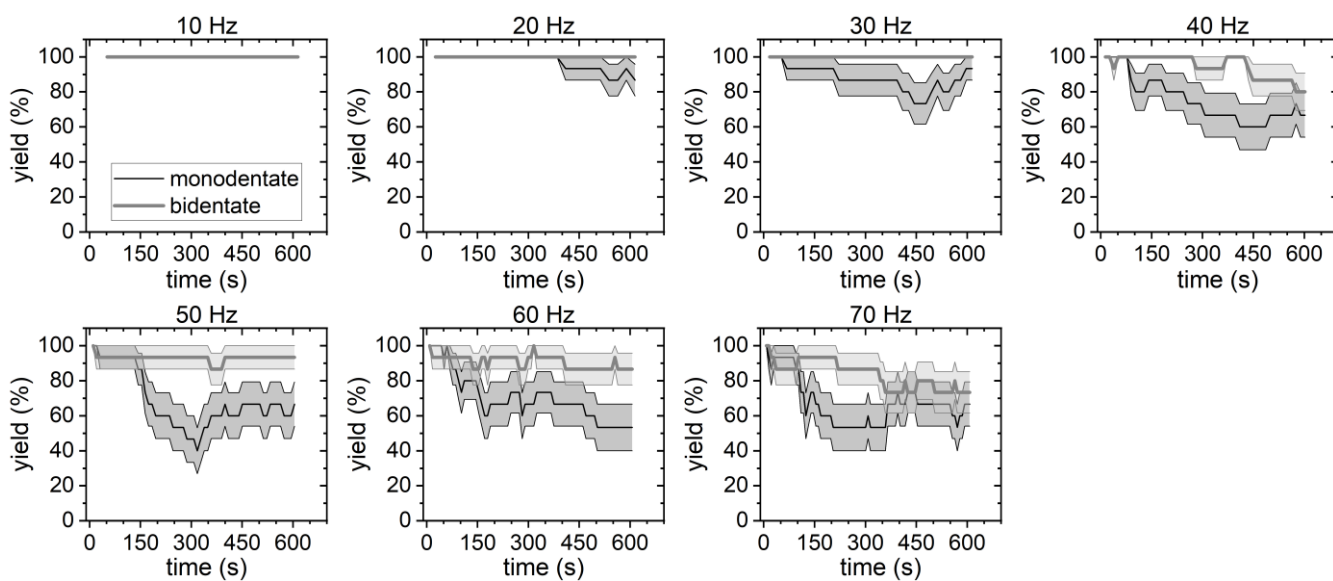

Figure S5. Binding yields obtained at different LRs and SR = 0.9.

## SUPPORTING INFORMATION

## Exponential decay fits of monodentate binding yields

The monodentate binding yields for all three SRs at  $LR \geq 30$  Hz have been analyzed by applying an exponential decay fit according to

$$\text{yield} = y_{SS} + (100\% - y_{SS})e^{-k_{\text{off,tip}}(t-t_0)}, \quad (\text{Equation 1})$$

with the steady-state binding yield  $y_{SS}$  as given in Figure 5 of the main article, the time point  $t_0$  at which the first HS-AFM image of the time series was recorded, and the dissociation rate constant  $k_{\text{off,tip}}$ . The fits are shown in Figures S6 to S8 and the obtained  $k_{\text{off,tip}}$  values are presented in Figure S9.

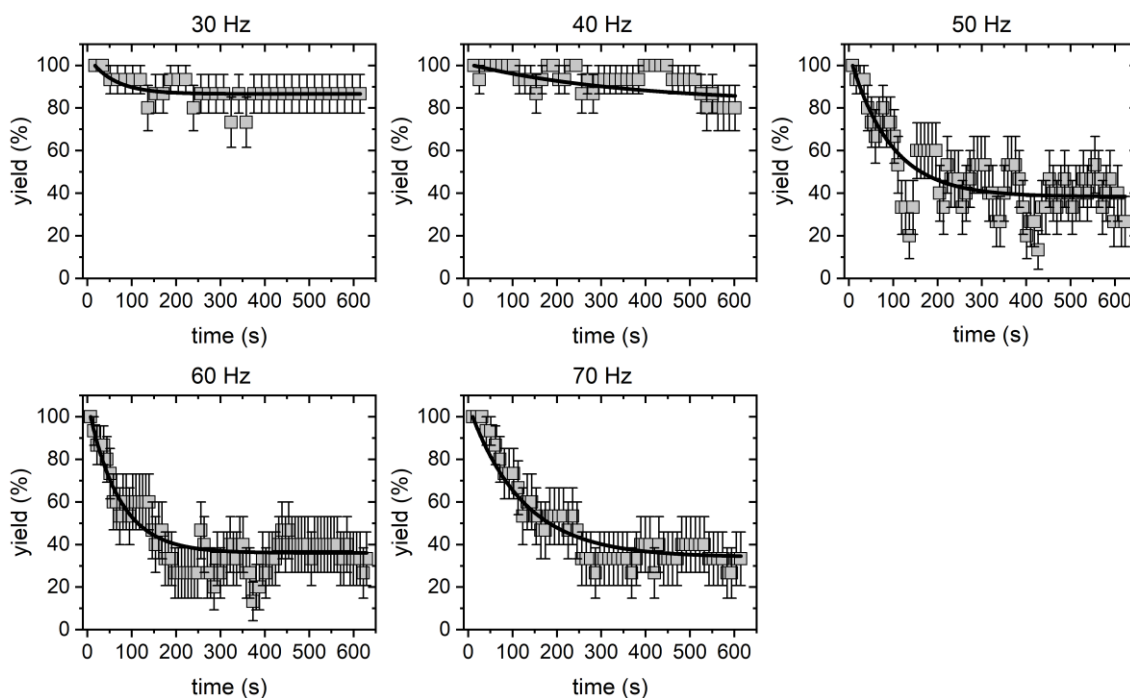

**Figure S6.** Monodentate binding yields obtained at different LRs and SR = 0.7 with corresponding fits according to equation 1.

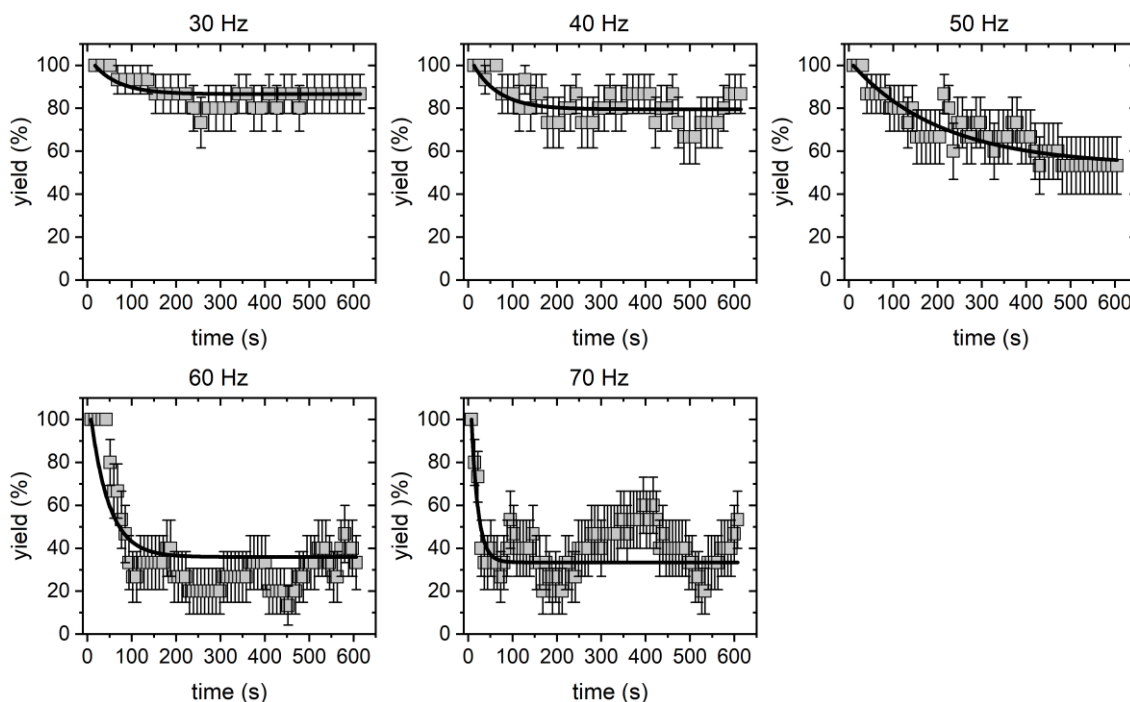

**Figure S7.** Monodentate binding yields obtained at different LRs and SR = 0.8 with corresponding fits according to equation 1.

## SUPPORTING INFORMATION

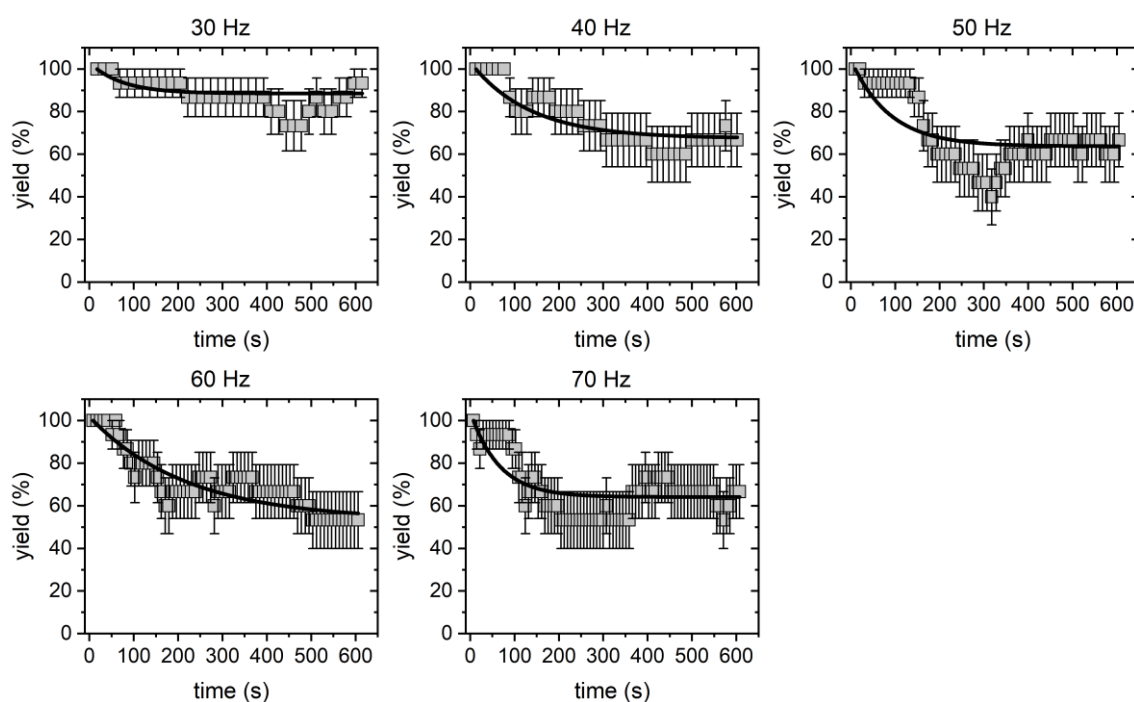

**Figure S8.** Monodentate binding yields obtained at different LRs and SR = 0.9 with corresponding fits according to equation 1.

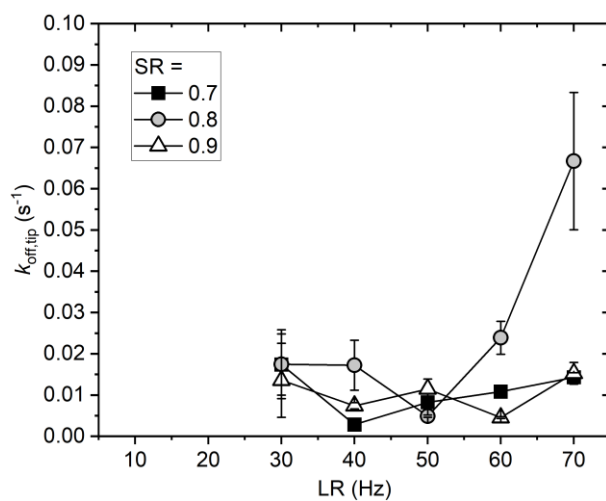

**Figure S9.** Tip-induced dissociation rate constants obtained from the fits shown in Figures S6 to S8. Note that the  $k_{\text{off,tip}}$  values are about 4 magnitudes larger than the  $k_{\text{off}}$  previously obtained for SAV-Bt dissociation in bulk solution.<sup>[3]</sup>



SUPPORTING INFORMATION

---

**References**

- [1] P. W. K. Rothmund, *Nature* **2006**, *440*, 297.  
[2] C. Kielar, F. V. Reddavid, S. Tubbenhauer, M. Cui, X. Xu, G. Grundmeier, Y. Zhang, A. Keller, *Angew. Chem. Int. Ed. Engl.* **2018**, *57*, 14873.  
[3] U. Piran, W. J. Riordan, *J. Immunol. Methods* **1990**, *133*, 141.

**Author Contributions**

Charlotte Kielar

Conceptualization: Equal, Data curation: Equal, Formal analysis: Lead, Investigation: Lead, Methodology: Equal, Validation: Equal, Visualization: Lead, Writing – original draft: Lead, Writing – review & editing: Supporting

Siqi Zhu

Data curation: Supporting, Formal analysis: Supporting, Investigation: Supporting, Validation: Supporting, Visualization: Supporting

Guido Grundmeier

Supervision: Supporting, Writing – original draft: Supporting, Writing – review & editing: Supporting

Adrian Keller

Conceptualization: Equal, Data curation: Equal, Formal analysis: Supporting, Methodology: Equal, Supervision: Lead, Validation: Equal, Writing – original draft: Supporting, Writing – review & editing: Lead
